# Supplementary material for: A question driven socio-hydrological modeling process
Source: Copernicus journal article supplement (doi:10.5194/hess-20-73-2016), 2016-01-15
Supplement: Supplementary file 1 [file hess-20-73-2016-supplement.zip]

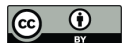

## *Supplement of*

# **A question driven socio-hydrological modeling process**

**M. Garcia et al.**

*Correspondence to:* M. Garcia ([margaret.garcia@tufts.edu](mailto:margaret.garcia@tufts.edu))

- `hess-20-73-2016-supplement-title-page.pdf`
- `ReservoirOperationsModel`
  - `DESCRIPTION`
  - `LaunchModel.R`
  - `ReadMe`
  - `SyntheticStreamflow.csv`
  - `Ui.R`
  - `multiplot.R`
  - `server.R`
  - `shFun.R`

The copyright of individual parts of the supplement might differ from the CC-BY 3.0 licence.
